# Supplementary material for: Metabolic Profiling of the Soft Coral Erythropodium caribaeorum (Alcyonacea: Anthothelidae) from the Colombian Caribbean Reveals Different Chemotypes
Source: PubMed Central journal article supplement (PMC7024379; doi:10.3390/md18010004), 2019-12-18
Supplement: marinedrugs-18-00004-s001.pdf [file marinedrugs-18-00004-s001.pdf]

## Metabolic profiling of the soft coral *Erythropodium caribaeorum* (Alcyonacea: Anthothelidae) from the Colombian Caribbean reveals different chemotypes (SUPPORTING INFORMATION)

Sandra L. Molina<sup>a</sup>, Abel M. Forero<sup>a</sup>, Farja I. Ayala<sup>a</sup>, Mónica Puyana<sup>b</sup>, Sven Zea<sup>c</sup>, Leonardo Castellanos<sup>a</sup>, Diego Muñoz<sup>a,d,e</sup>, Gonzalo Arboleda<sup>d</sup>, Adrián G. Sandoval-Hernández<sup>a,d</sup>  
Freddy A. Ramos<sup>a\*</sup>

<sup>a</sup>Universidad Nacional de Colombia - Sede Bogotá - Facultad de Ciencias - Departamento de Química, Av Cra 30 45-03 Bogotá, Colombia

<sup>b</sup>Universidad Jorge Tadeo Lozano - Sede Bogotá - Facultad de Ciencias Naturales e Ingeniería – Departamento de Ciencias Biológicas y Ambientales, Cra 4 22-61 Bogotá, Colombia

<sup>c</sup>Universidad Nacional de Colombia - Sede Caribe - Instituto de Estudios en Ciencias del Mar-CECIMAR - Santa Marta, Colombia

<sup>d</sup>Universidad Nacional de Colombia - Sede Bogotá - Instituto de Genética Humana, Bogotá, Colombia

<sup>e</sup>Facultad de Ciencias, Universidad de Ciencias Aplicadas y Ambientales, Bogotá, Colombia.

Received: date; Accepted: date; Published: date

[\\*faramosr@unal.edu.co](mailto:faramosr@unal.edu.co)

**Table S1.** Variables responsible of the separation among samples with the same m/z ions, and similar retention times.

| <b>Object</b> | <b>m/z</b> | <b>Retention time (minutes)</b> |
|---------------|------------|---------------------------------|
| <b>2519</b>   | 519.15     | 8.16                            |
| <b>2528</b>   | 519.15     | 7.63                            |
| <b>2613</b>   | 519.11     | 8.30                            |
| <b>3714</b>   | 519.15     | 8.23                            |
| <b>3719</b>   | 519.18     | 8.25                            |
| <b>3721</b>   | 519.10     | 8.30                            |
| <b>3738</b>   | 519.15     | 7.70                            |
| <b>3781</b>   | 519.15     | 5.64                            |
| <b>8784</b>   | 519.15     | 6.38                            |
| <b>10727</b>  | 519.15     | 8.20                            |
| <b>10728</b>  | 519.14     | 6.66                            |
| <b>10731</b>  | 519.12     | 8.22                            |
| <b>10735</b>  | 519.15     | 6.64                            |
| <b>15076</b>  | 519.15     | 8.26                            |
| <b>22787</b>  | 519.17     | 8.25                            |

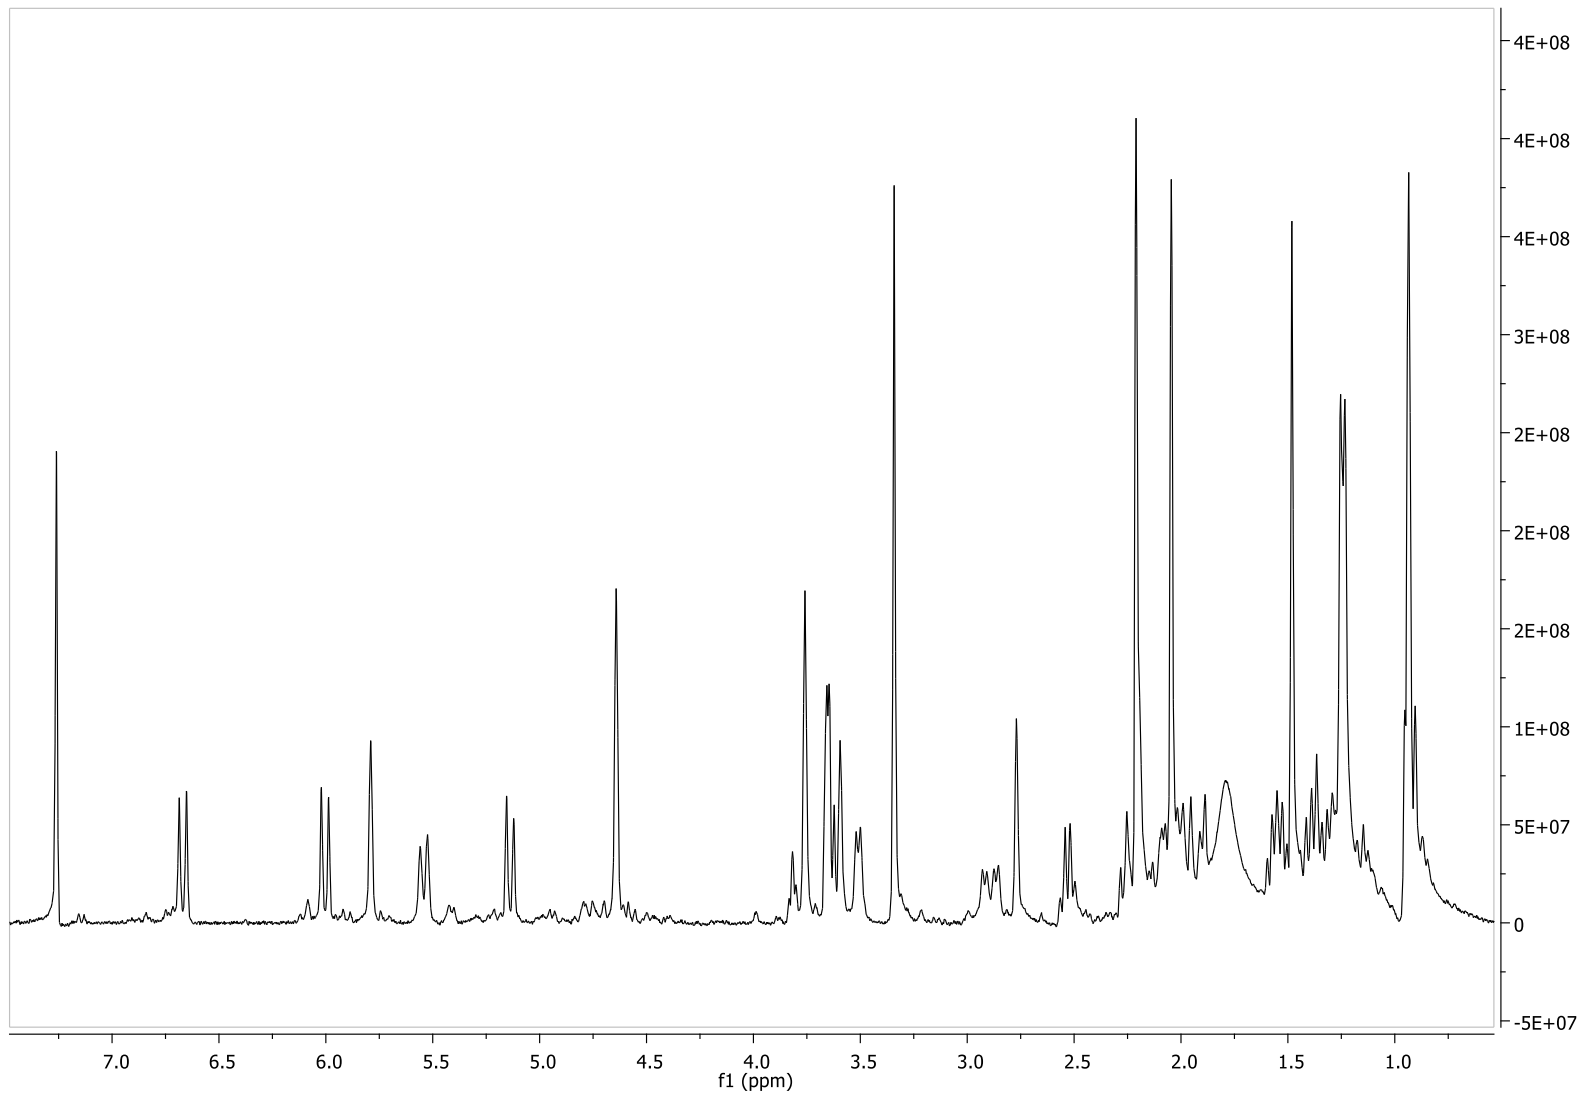

**Figure 1S.**  $^1\text{H-NMR}$  at 300 MHz spectra of erythrolide W in  $\text{CDCl}_3$ .

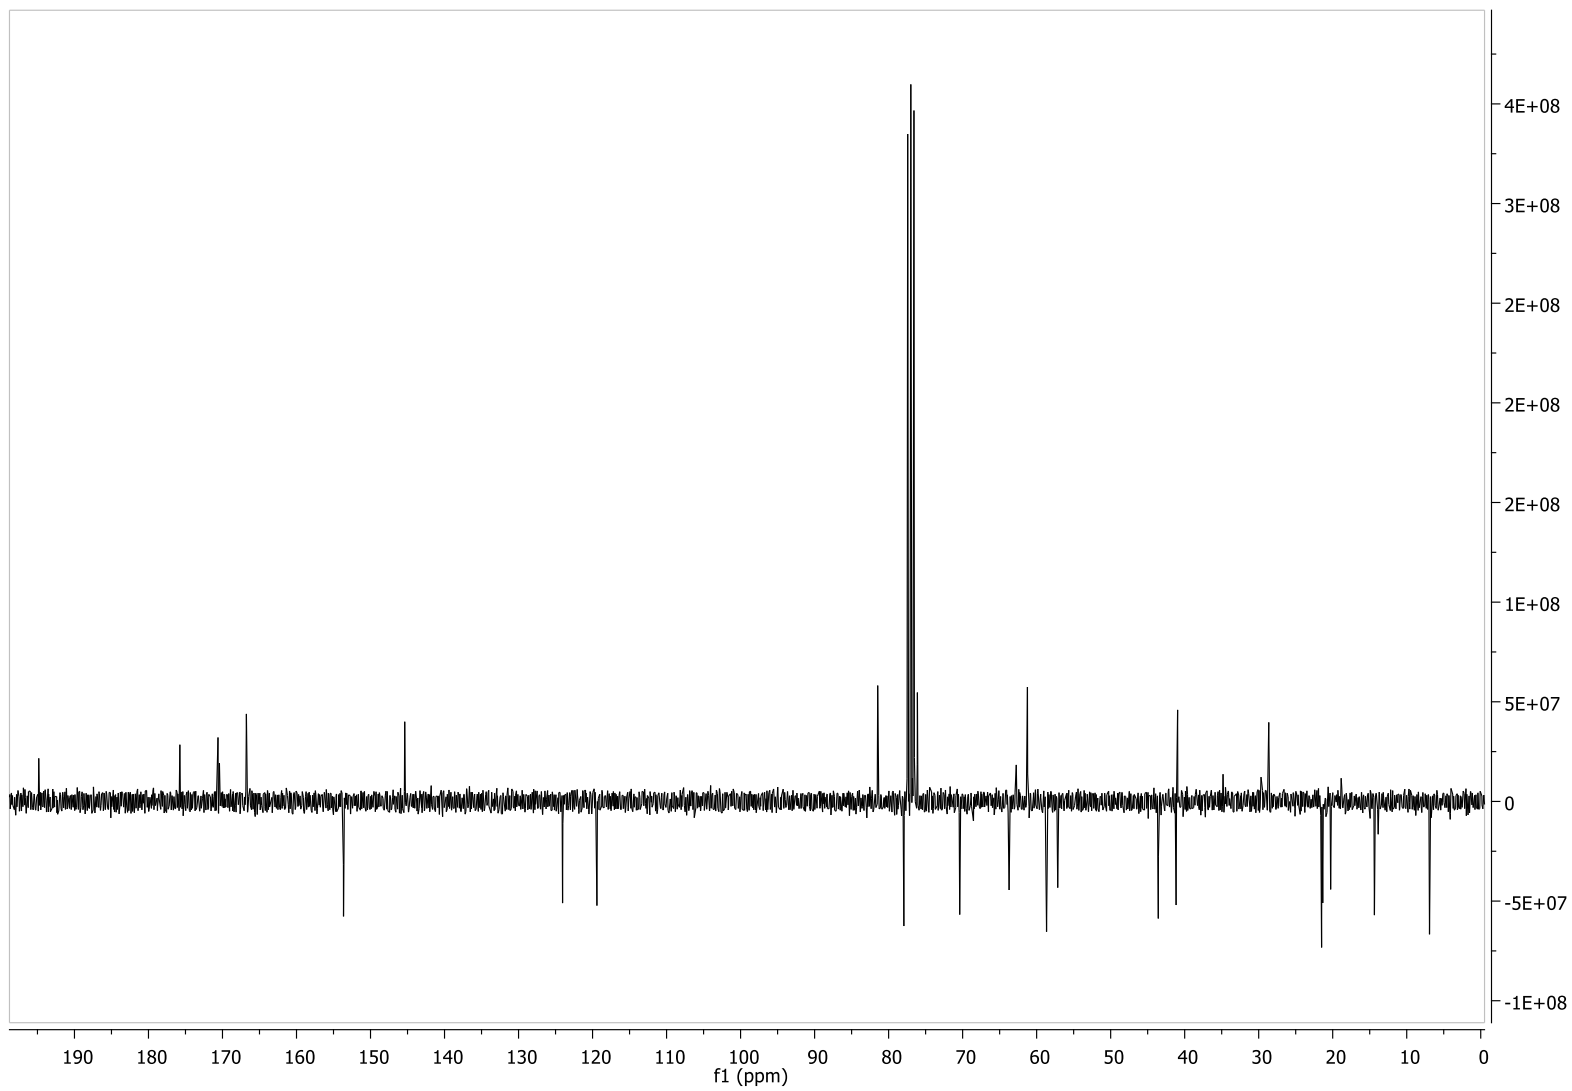

**Figure 2S.** APT-NMR at 75 MHz spectra of erythrolide W in CDCl<sub>3</sub>.

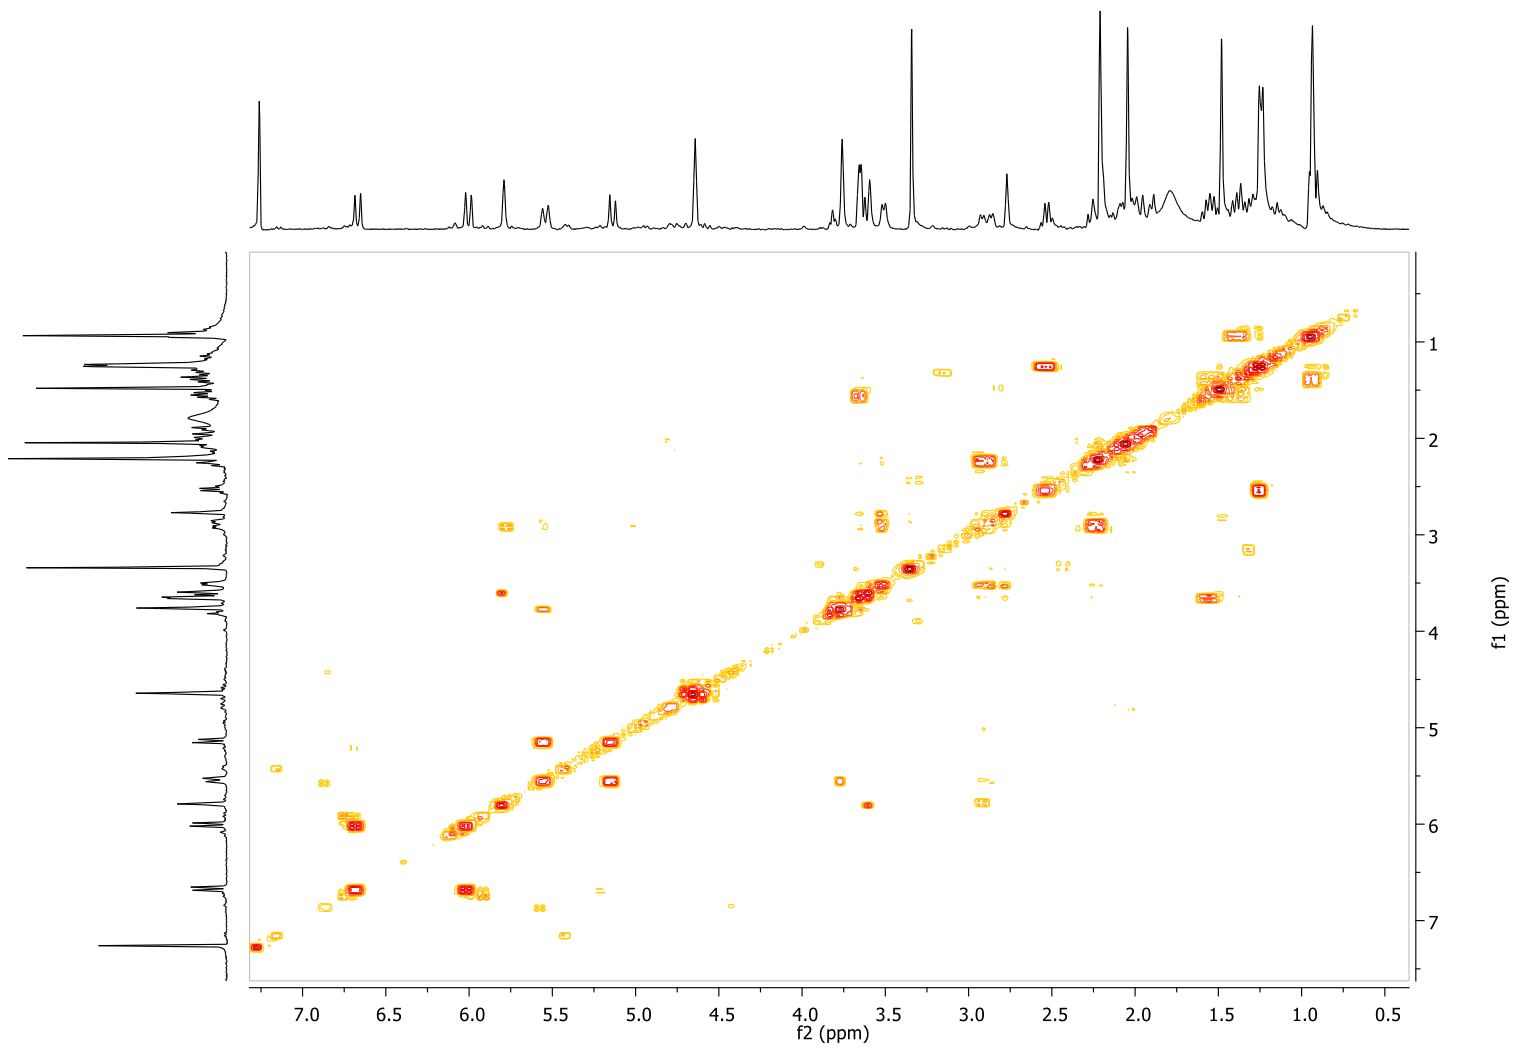

**Figure 3S.** COSY spectra of erythrolide W in  $\text{CDCl}_3$ .

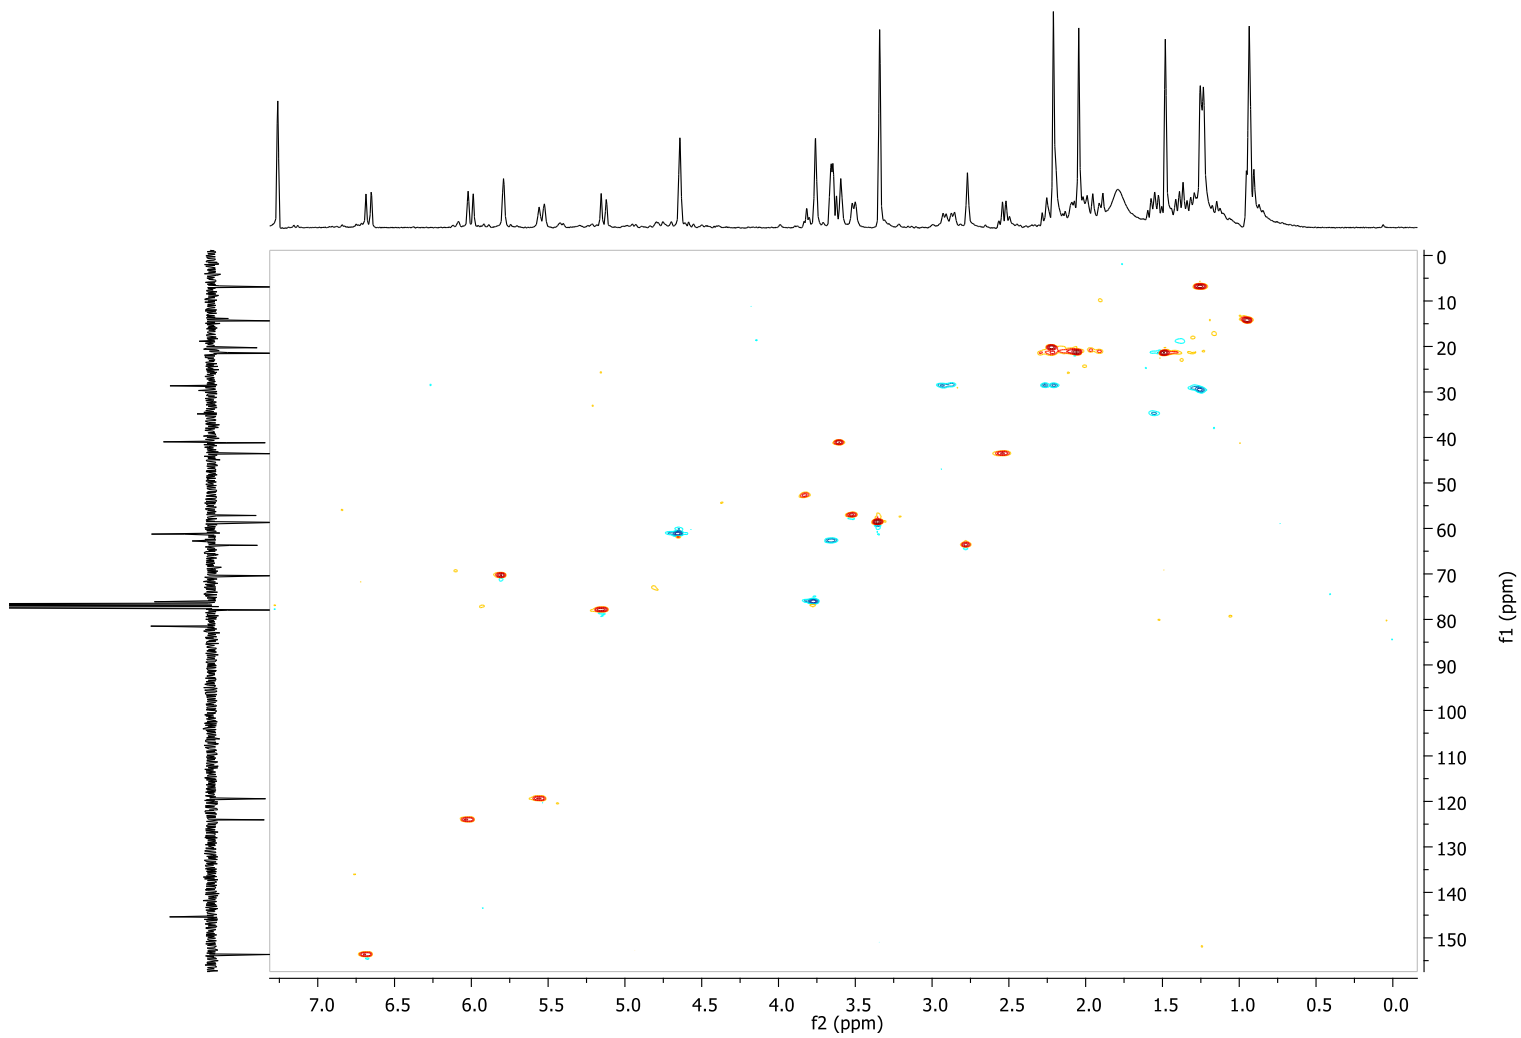

**Figure 4S.** HSQC spectra of erythrolide W in CDCl<sub>3</sub>.

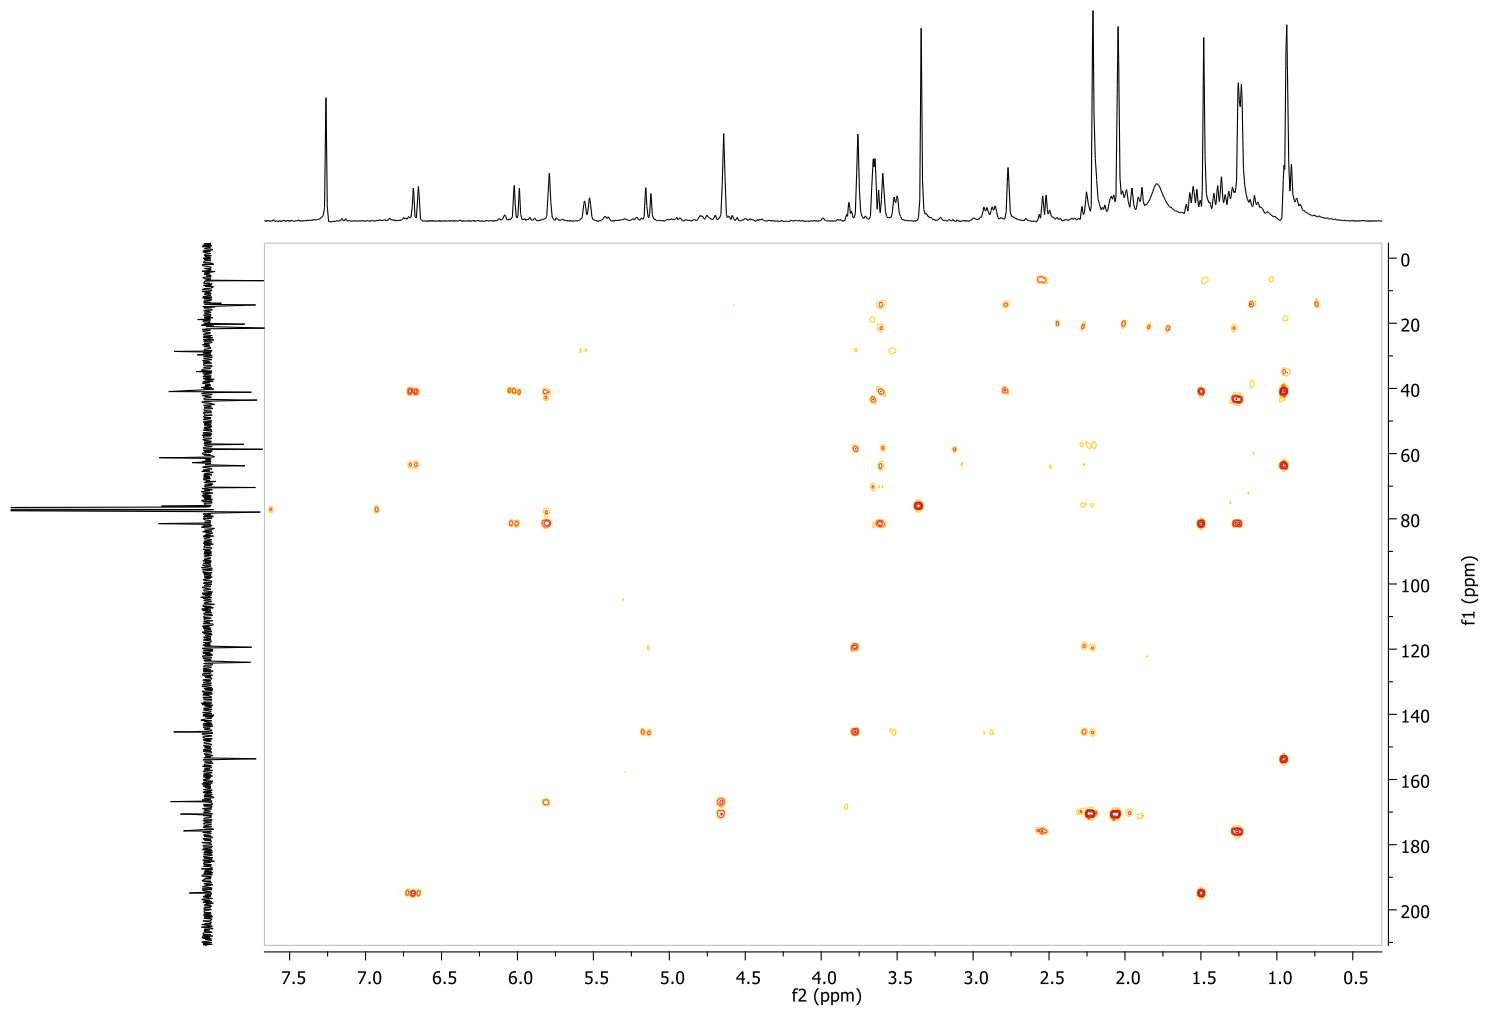

**Figure 5S.** HMBC spectra of erythrolide W in CDCl<sub>3</sub>.

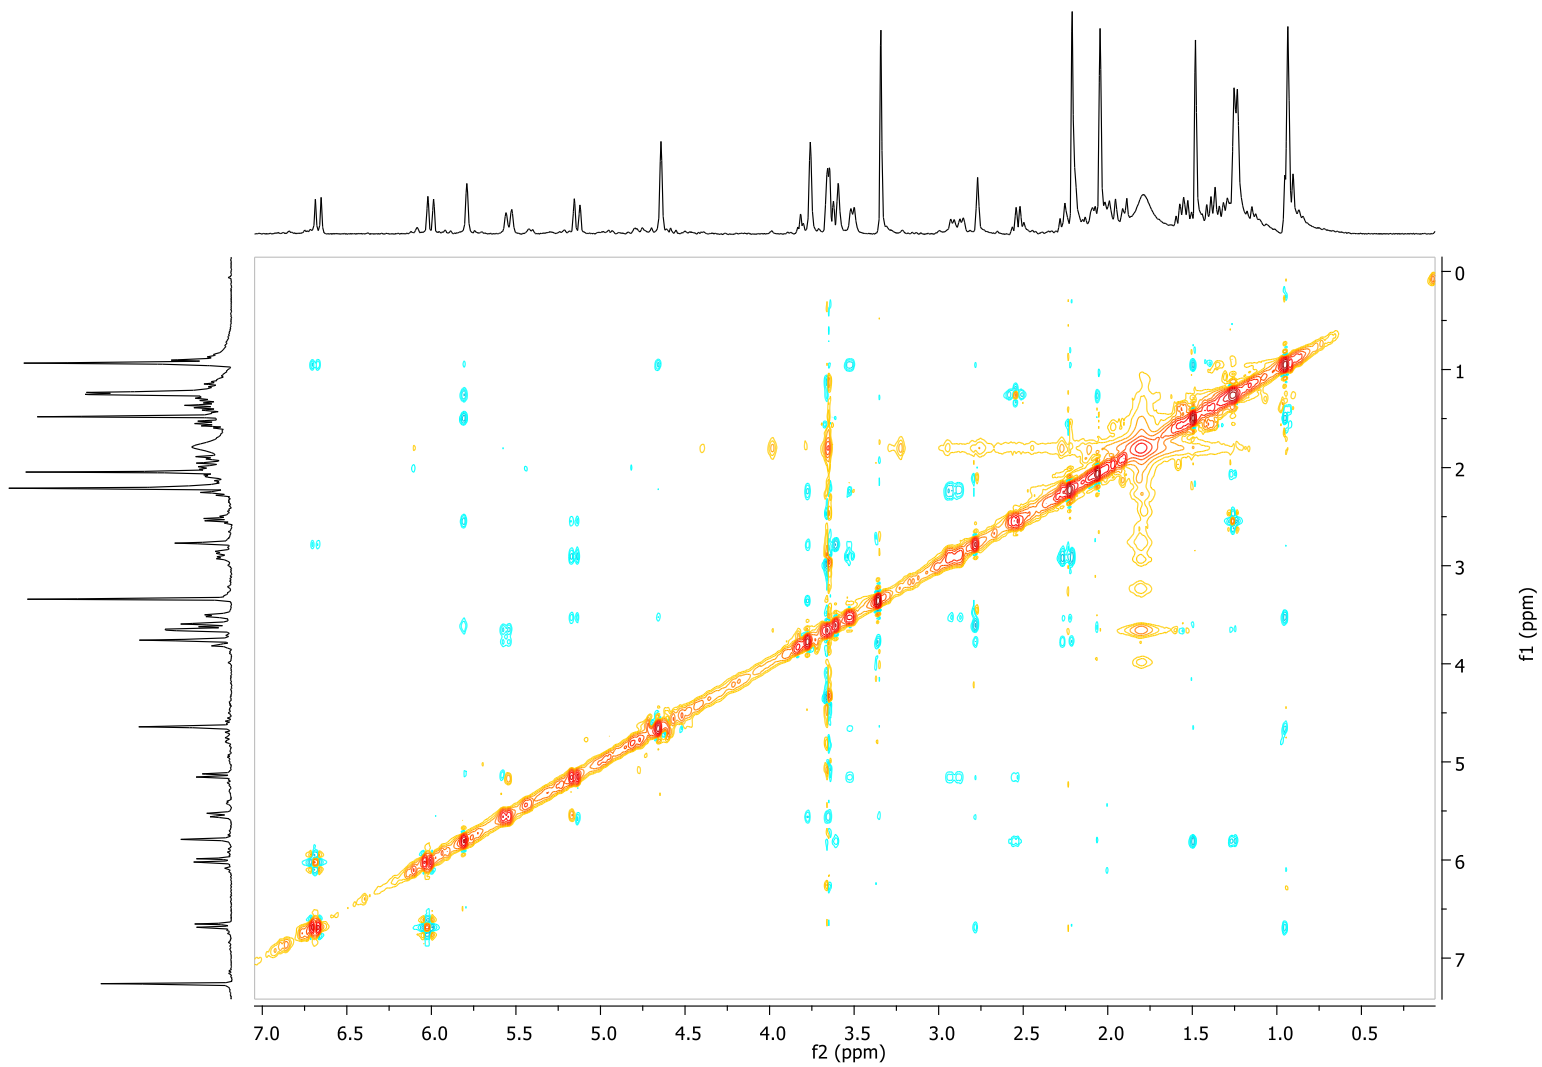

**Figure 6S.** NOESY spectra of erythrolide X in  $\text{CDCl}_3$ .

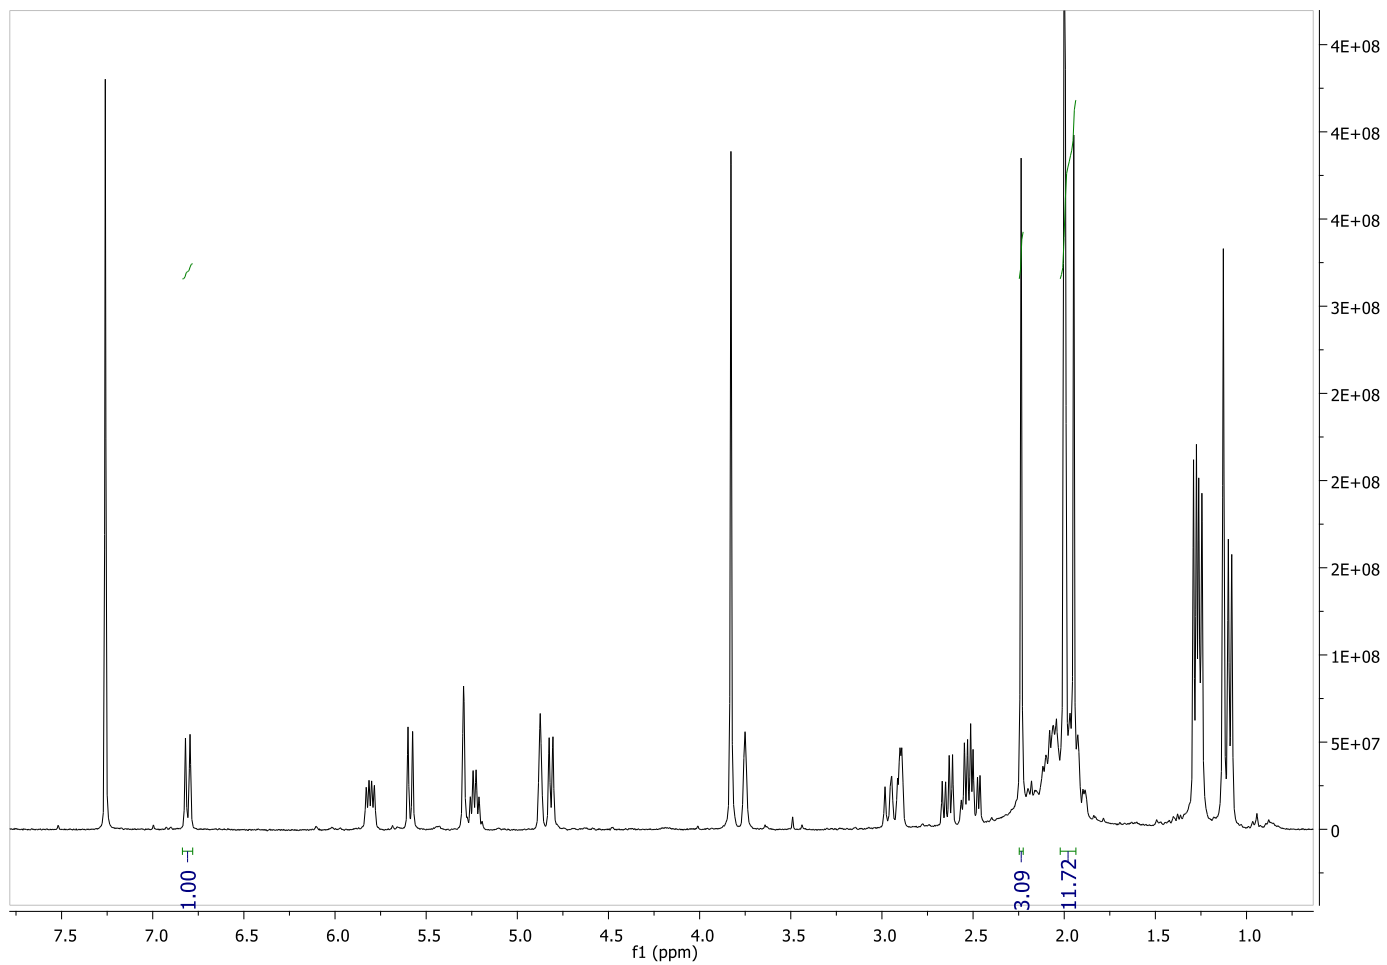

**Figure 7S.**  $^1\text{H-NMR}$  at 400 MHz spectra of erythrolide X in  $\text{CDCl}_3$ .



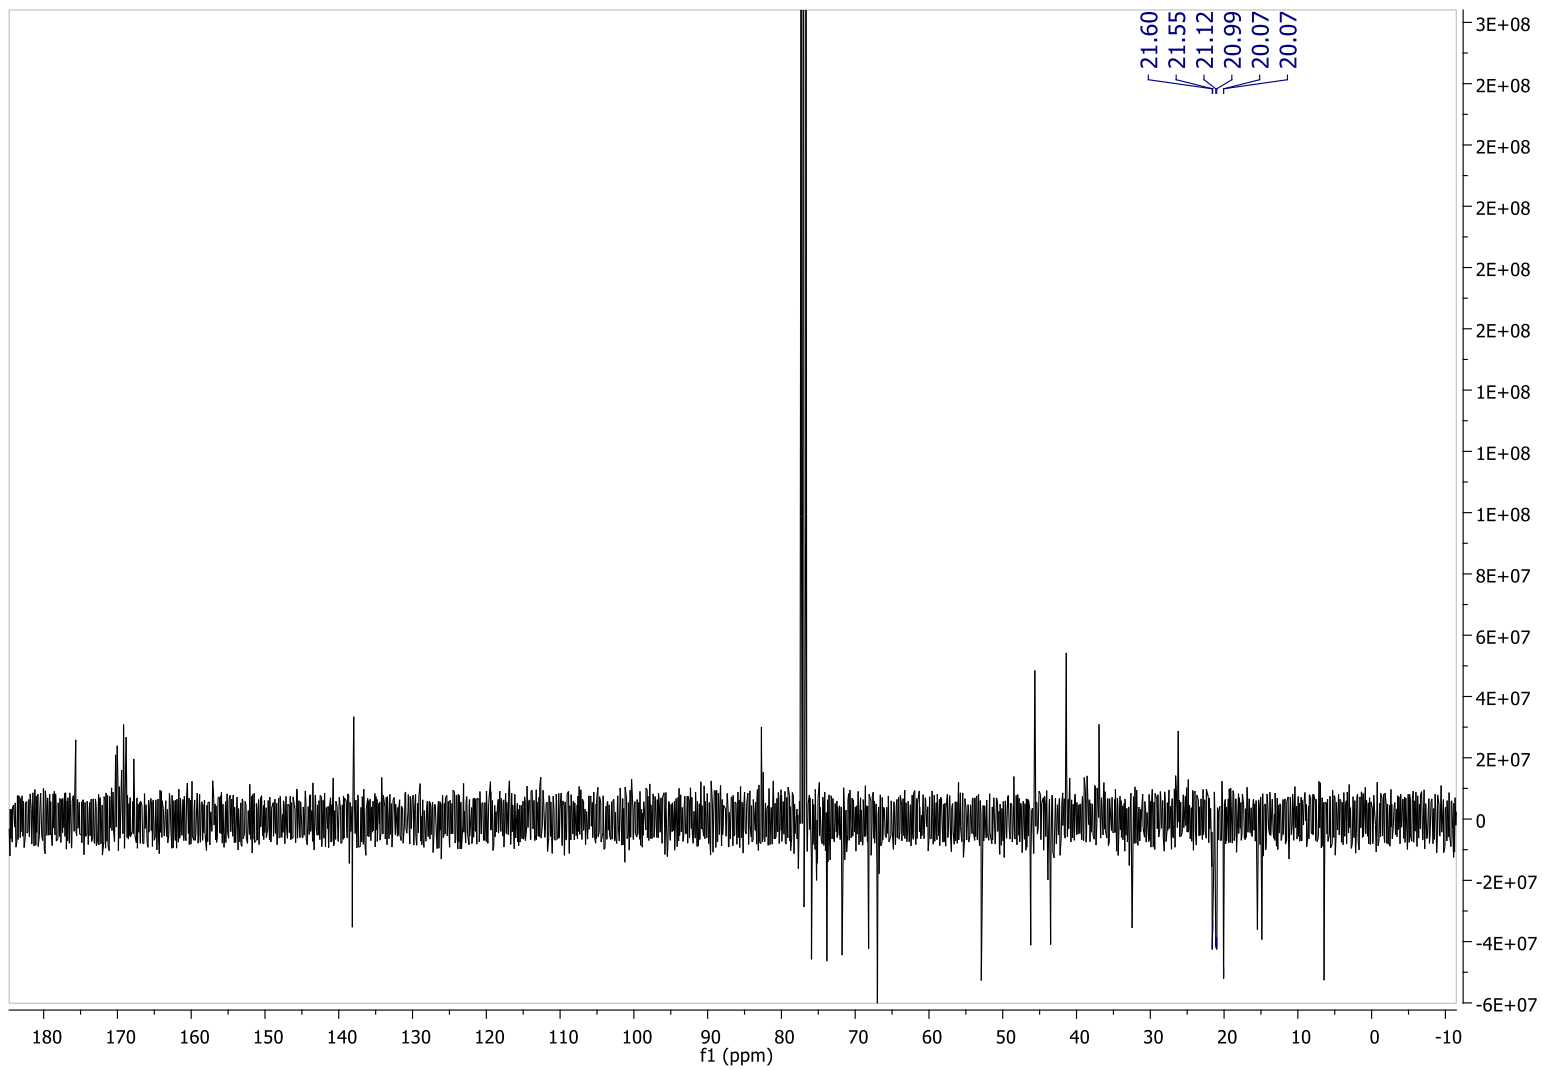

**Figure 8S.** APT spectra at 100 MHz of erythrolide X in CDCl<sub>3</sub>.

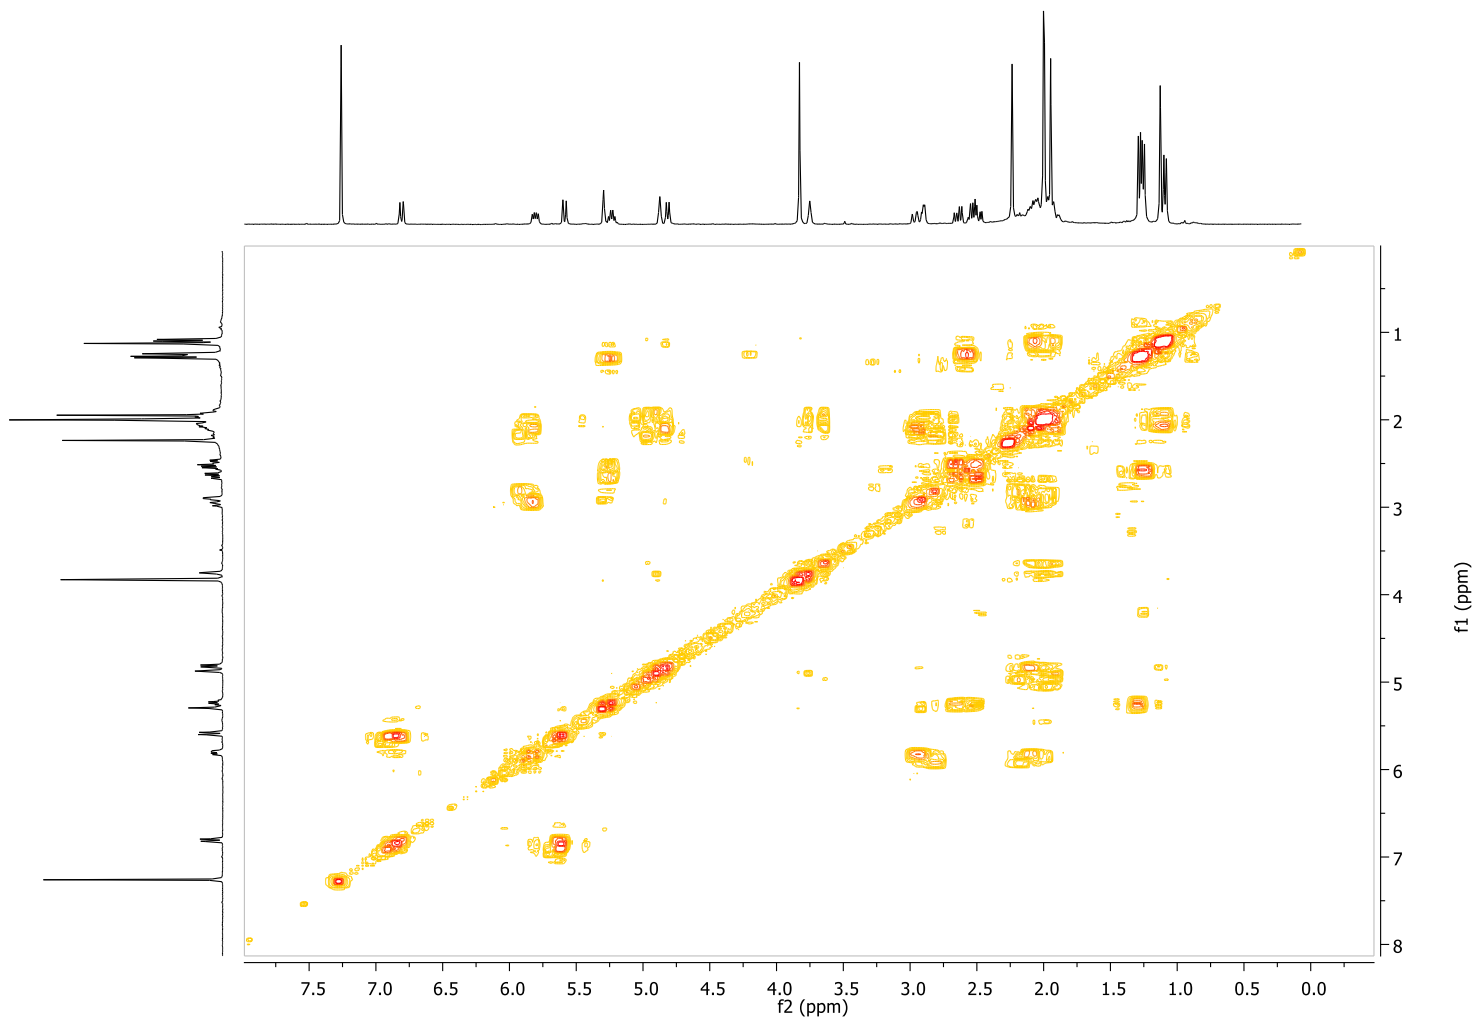

**Figure 9S.** COSY spectra of erythrolide X in  $\text{CDCl}_3$ .

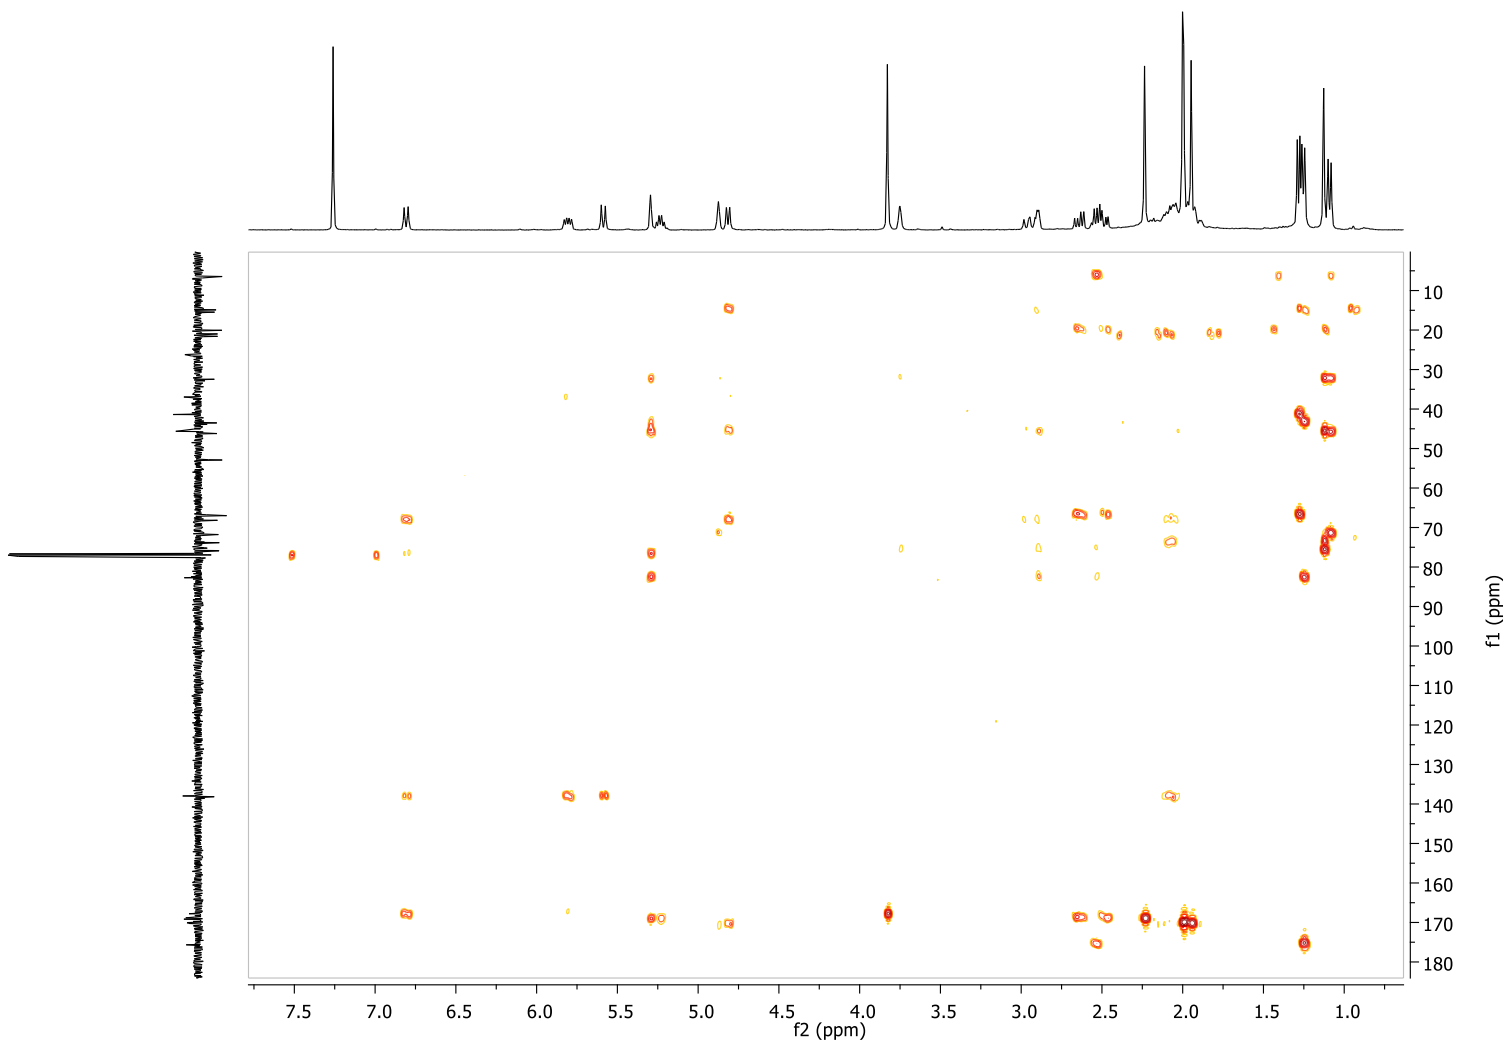

**Figure 10S.** HMBC spectra of erythrolide X in  $\text{CDCl}_3$

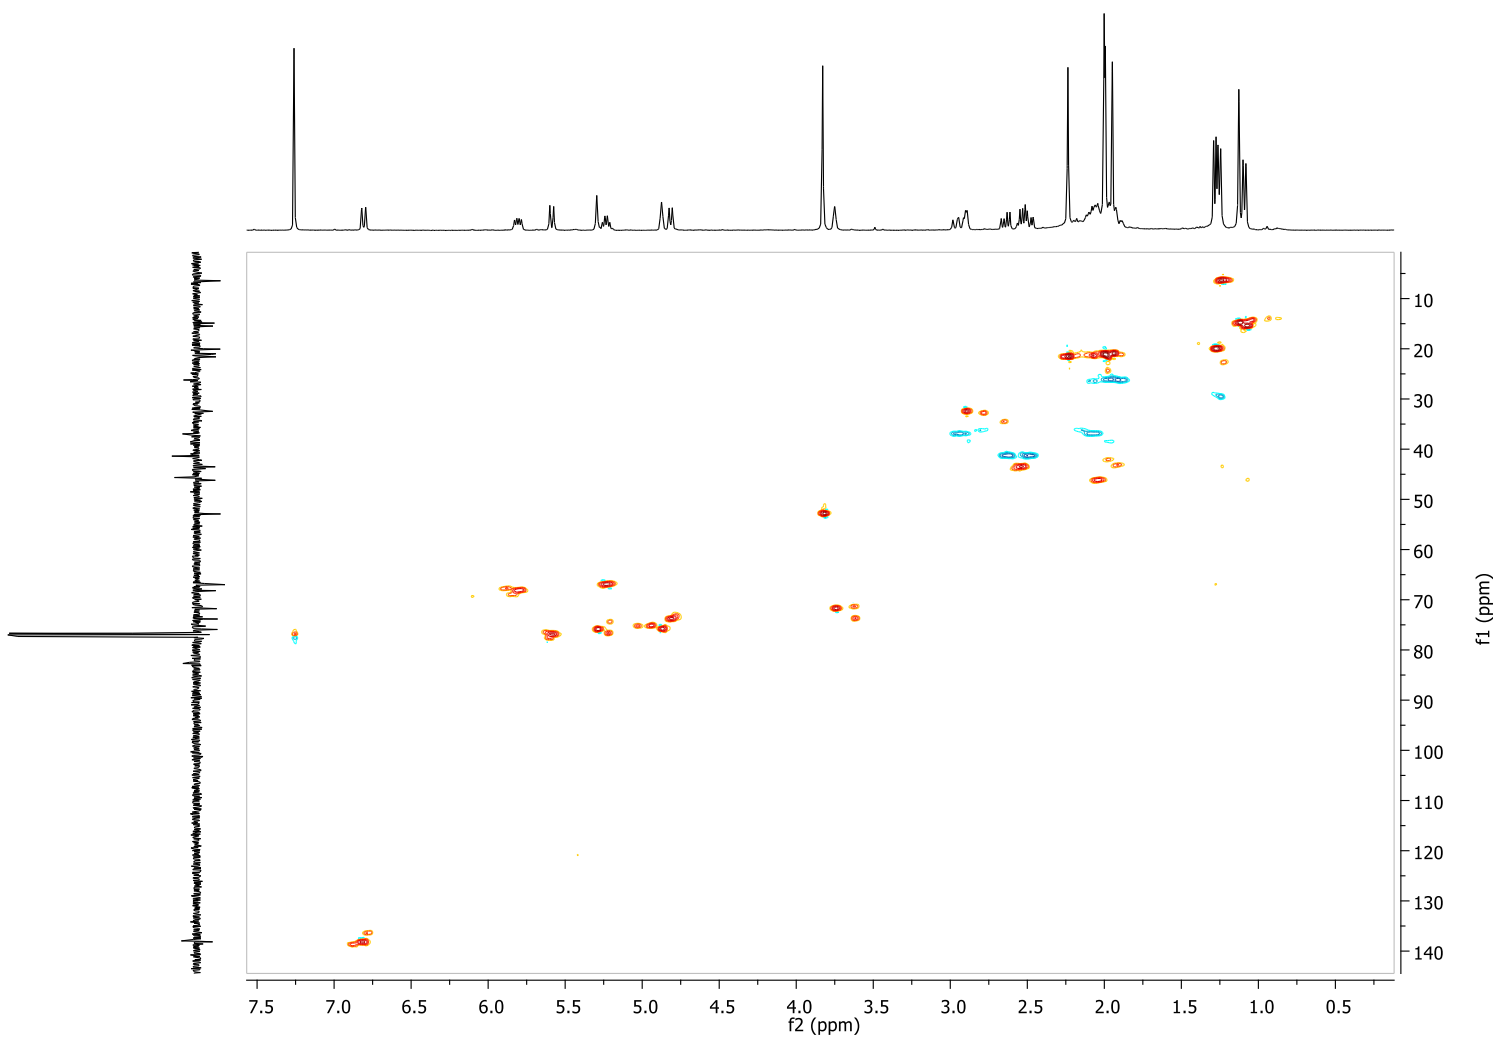

**Figure 11S.** HSQC spectra of erythrolide X in CDCl<sub>3</sub>

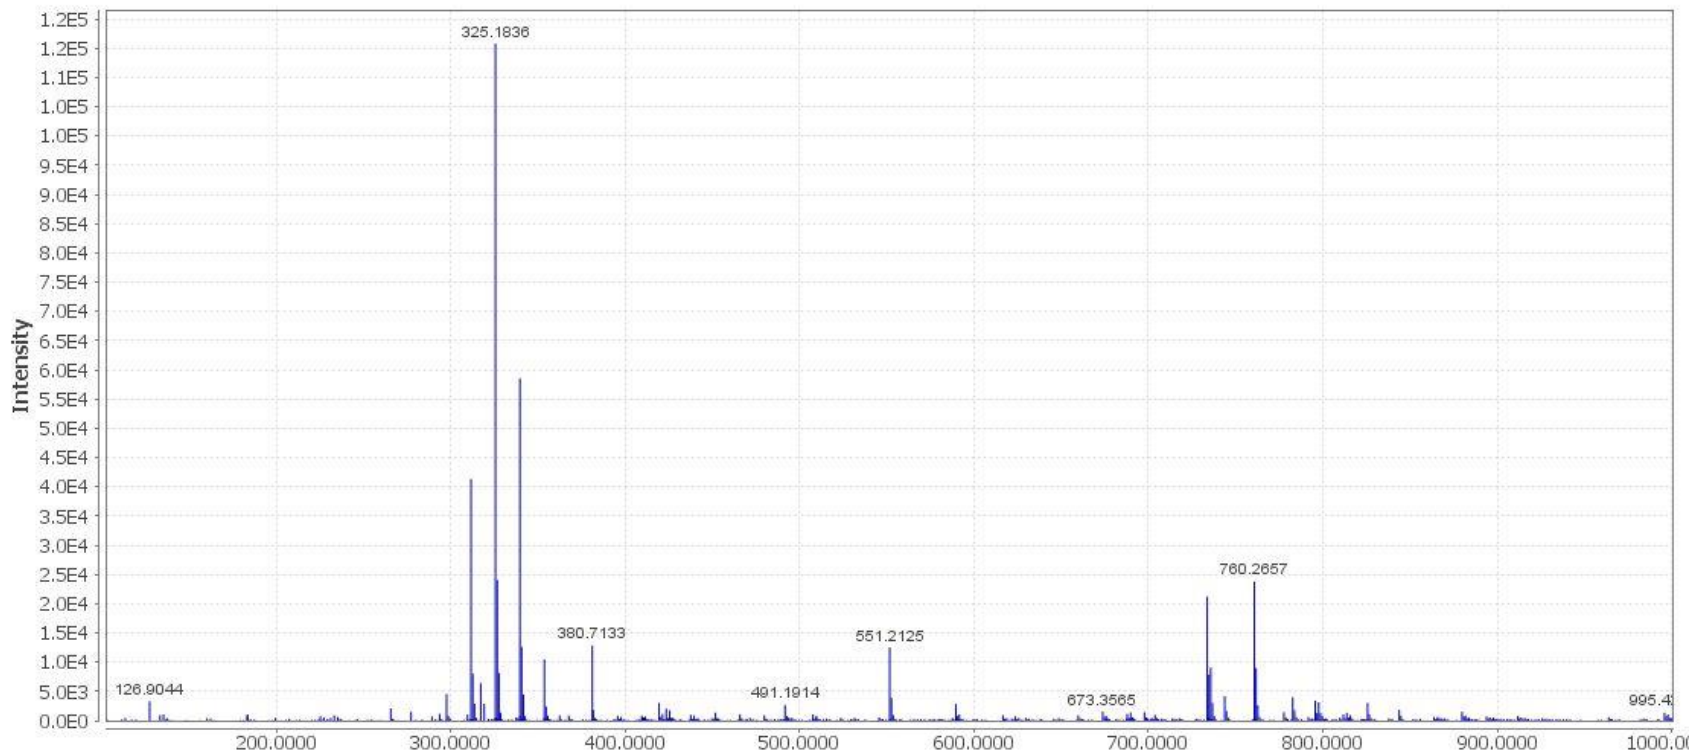

**Figure 12S.** MS spectra negative mode of erythrolide X

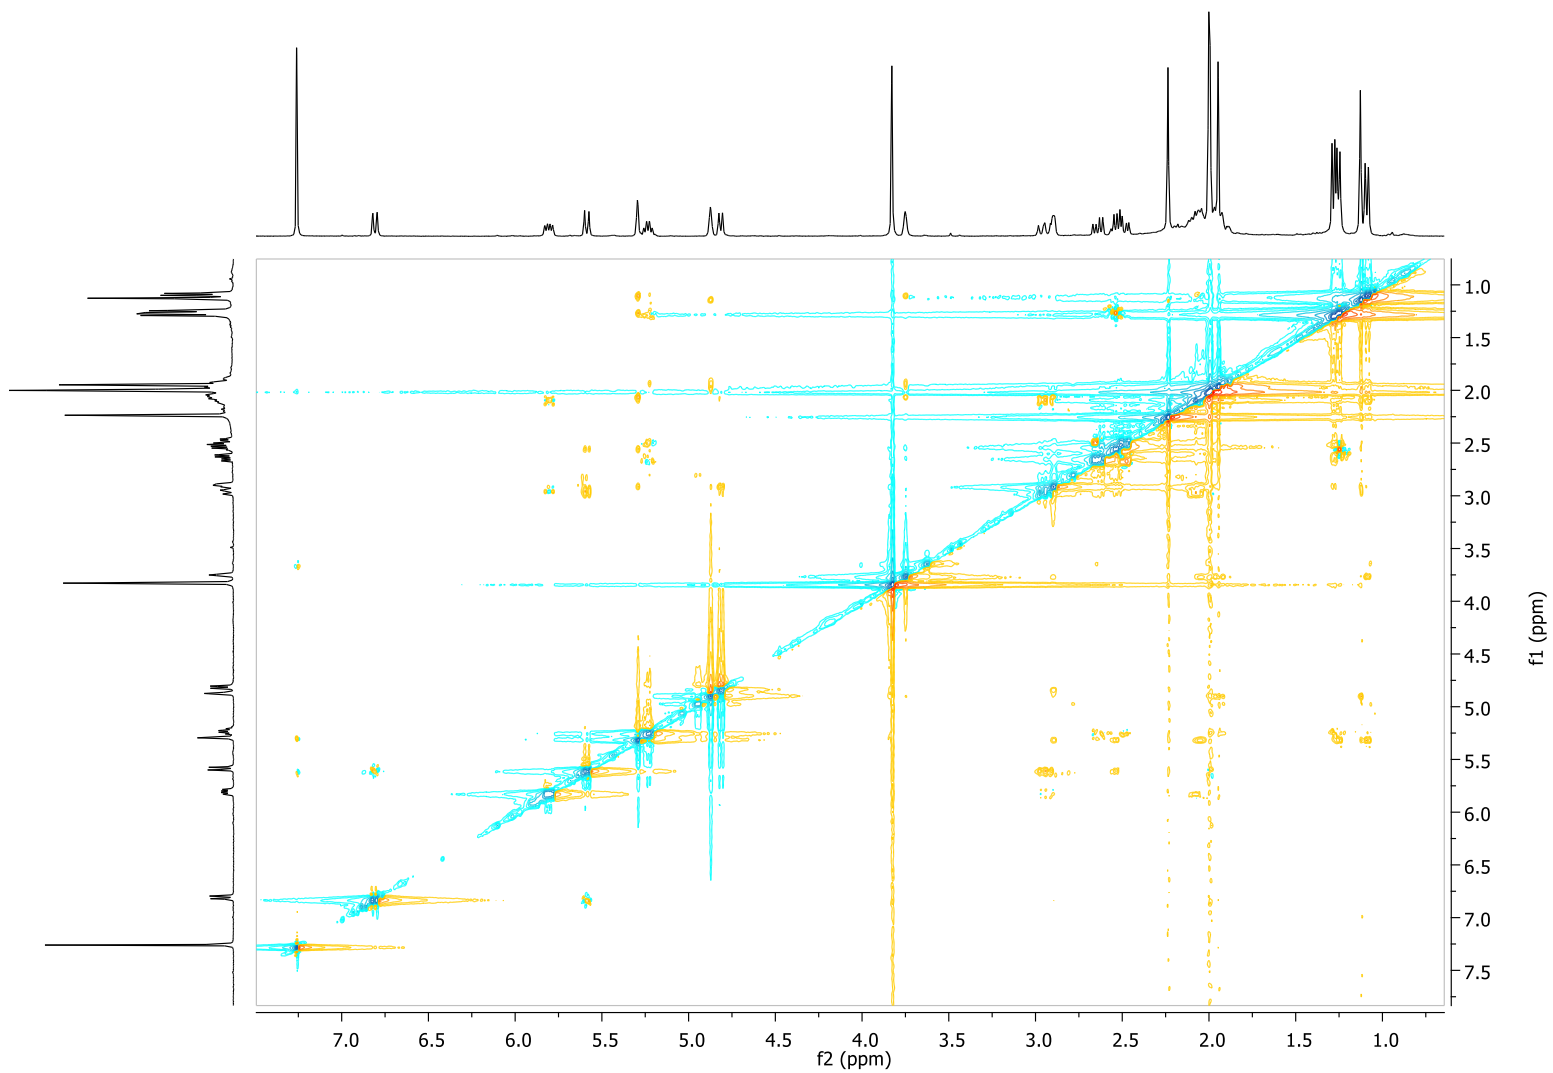

**Figure 13S.** NOESY spectra of erythrolide X in  $\text{CDCl}_3$
